# Supplementary material for: Food anaphylaxis in the United Kingdom: analysis of national data, 1998-2018
Source: PubMed Central journal article supplement (PMC7885259; doi:10.1136/bmj.n251), 2021-02-17
Supplement: basc061604.ww.pdf [file basc061604.ww.pdf]

# Food Anaphylaxis in the UK: an analysis of national data, 1998-2018

Alessia Baseggio Conrado, Despo Ierodiakonou, M. Hazel Gowland,

Robert J. Boyle, Paul J. Turner

## SUPPLEMENTARY FIGURES

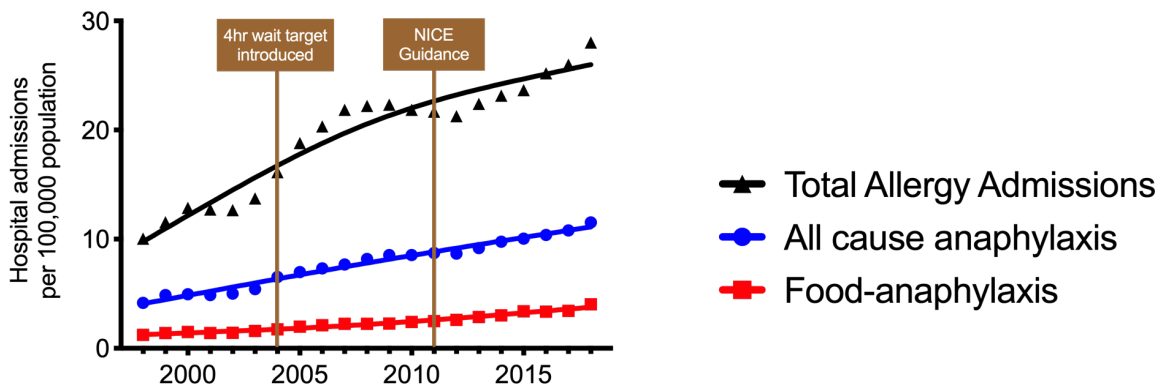

**Suppl. Figure 1:** Hospital admissions for “allergy”, all-cause anaphylaxis and food-induced anaphylaxis in the United Kingdom from 1998-2018.

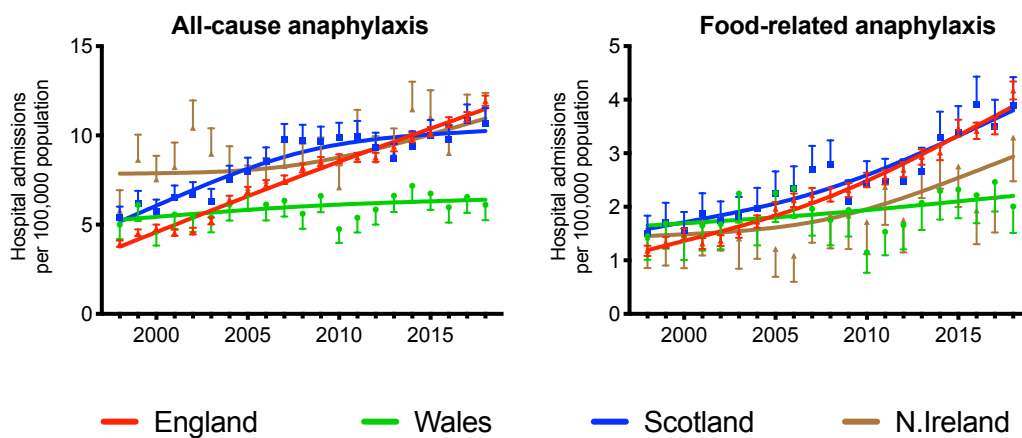

**Suppl. Figure 2:** Time trends in anaphylaxis admissions by devolved nation. Vertical bars represent SEMs.
